# Supplementary material
Source: PubMed Central journal article supplement (PMC4424034)
Supplement: supp_pp.15.00315_00315R1_Supplemental_Figure_S1.pdf [file supp_pp.15.00315_00315R1_Supplemental_Figure_S1.pdf]

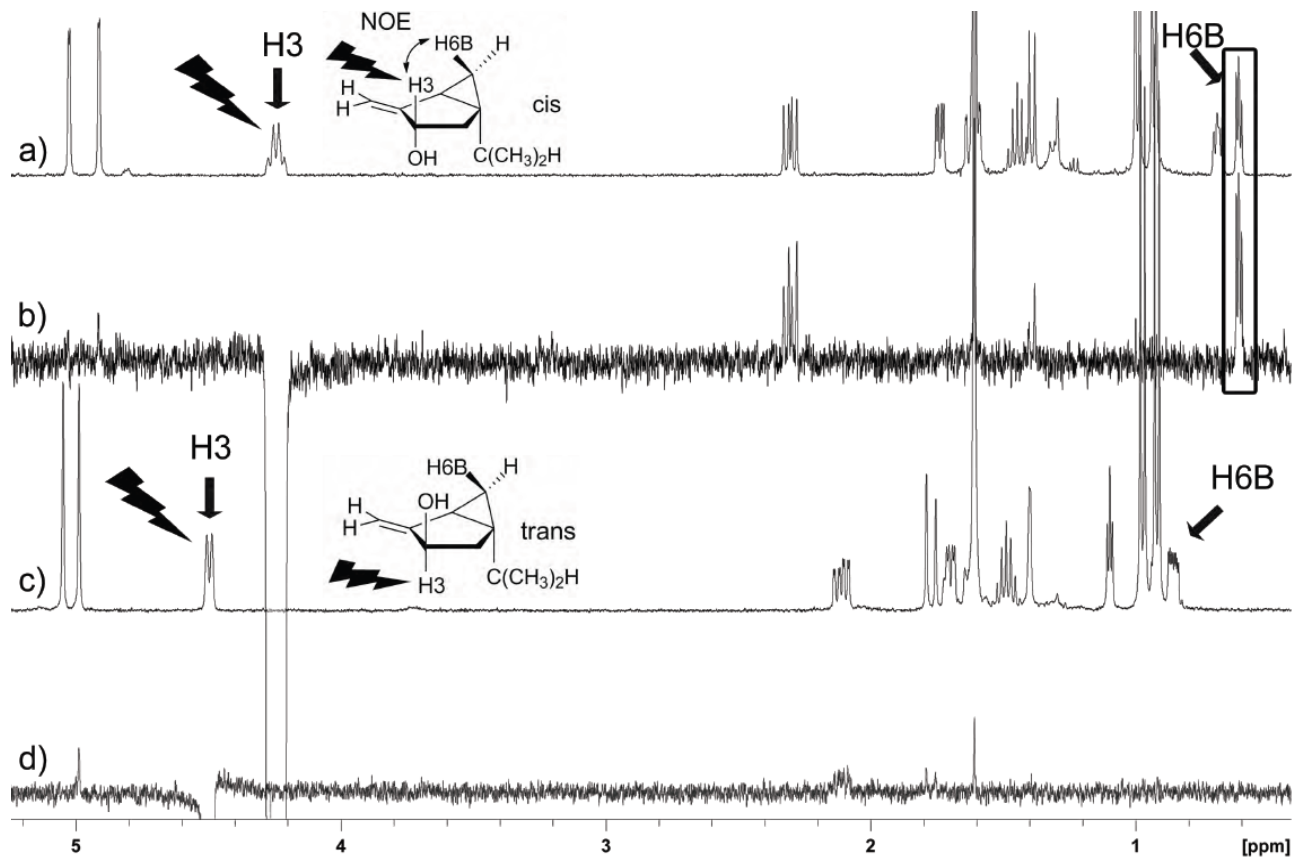

**Supplemental Figure S1: Determination of (+)-sabinol stereochemistry.** Relative orientation of the 3-hydroxy group of (+)-sabinol as *trans* or *cis* to the C6 methylene group verified by 1D NOE NMR experiments: Position H3 of both isomers (a, *cis*; c, *trans*) was selectively irradiated, 1D NOE spectra were recorded (b, *cis*; d, *trans*). Only for the *cis* isomer was a H3-H6B NOE correlation observed (black rectangle).
