# Supplementary material
Source: PubMed Central journal article supplement (PMC4424034)
Supplement: supp_pp.15.00315_00315R1_Supplemental_Figure_S2.pdf [file supp_pp.15.00315_00315R1_Supplemental_Figure_S2.pdf]

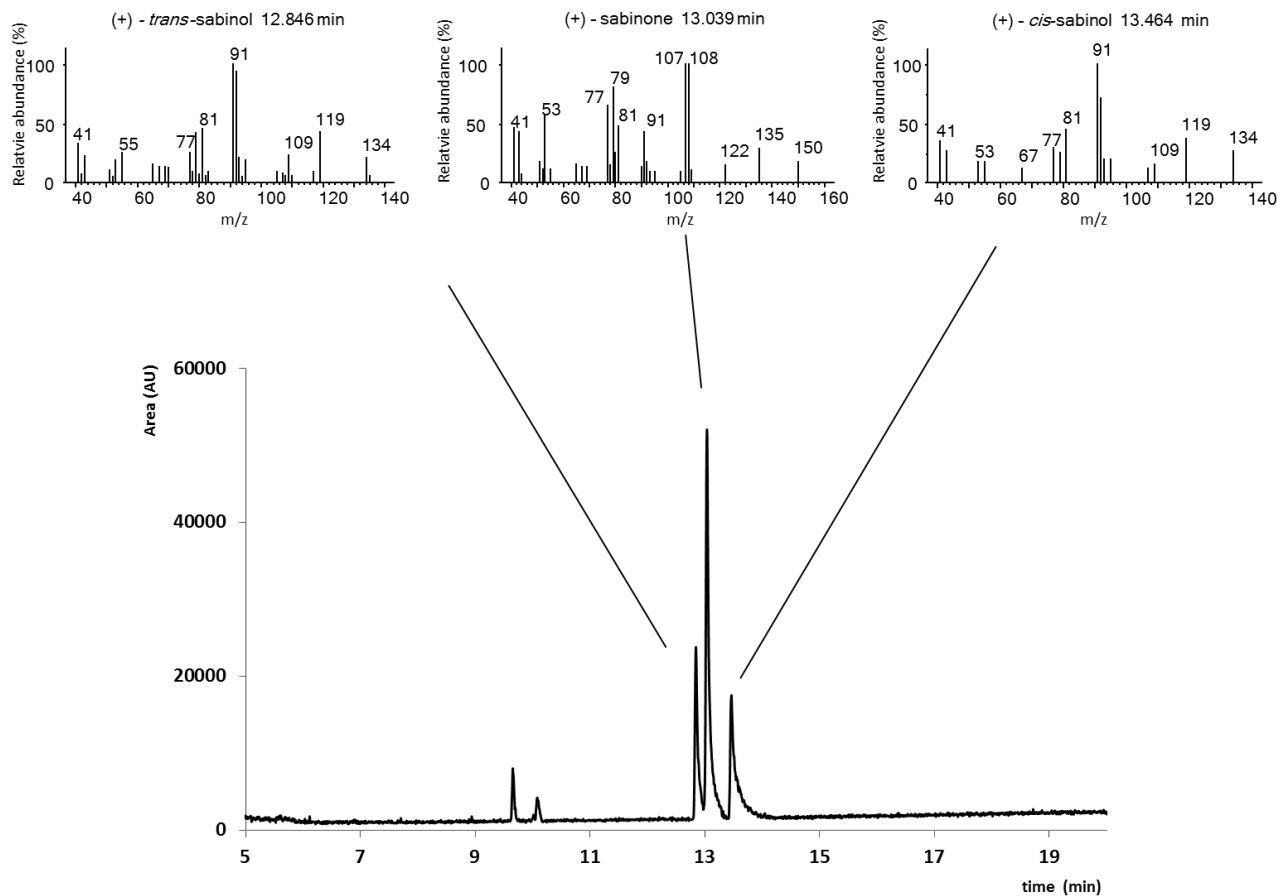

**Supplemental Figure S2: GC-MS separation and detection of (+)-*trans*-sabinol, (+)-*cis*-sabinol and (+)-sabinone.**

Separation of (+)-*trans*-sabinol, (+)-*cis*-sabinol and (+)-sabinone on a DB1 column (30 m x 250  $\mu\text{m}$ , 0.25  $\mu\text{m}$ ) is shown as total ion chromatogram (TIC). The corresponding mass spectral fragmentation patterns are given for each compound. (+)-*trans*-sabinol and (+)-*cis*-sabinol are diastereomers that can be separated on non-chiral columns. Retention indices were determined on DB1 and HP5 column: (+)-*trans*-sabinol (DB1 1124; HP5 1137), (+)-*cis*-sabinol (DB1 1147; HP5 1140) and (+)-sabinone (DB1 11320; HP5 1143).
