# Supplementary material
Source: PubMed Central journal article supplement (PMC4424034)
Supplement: supp_pp.15.00315_00315R1_Supplemental_Table_S1.pdf [file supp_pp.15.00315_00315R1_Supplemental_Table_S1.pdf]

**Supplemental Table S1: Primers used for full-length cDNA isolation, qRT-PCR and pESC-Leu2d modification**

**Full-length cDNA Isolation**

| <b>Target Gene</b> | <b>Orientation</b> | <b>Sequence in 5'-3' direction</b>      |
|--------------------|--------------------|-----------------------------------------|
| CYP76AA20          | fwd                | ATGGAAAGCCATCTGTTCTACTGCTAT             |
| CYP76AA20          | rev                | CTAATATATGTGATGTTGTAGGCGTGGTG           |
| CYP76AA21          | fwd                | ATGGAAAGCTATTATGCCCATCTTTTG             |
| CYP76AA21          | rev                | CTAATATATGTTATGTGGCAGGCGTG              |
| CYP76AA22          | fwd                | ATGGAAATTCCACAACCTTTCTTGGTATTCTGTTT     |
| CYP76AA22          | rev                | CTAGTATAGATGATGCGGCAGACGTGGCA           |
| CYP76AA23          | fwd                | GTAAGTATAGATGATGCGGCAGACGTGGCA          |
| CYP76AA23          | rev                | TTAGTACAAGTTATGTGGGAGGCGTGGTATGGCA      |
| CYP76AA24          | fwd                | ATGGATAAGCAACCGGTGTTCTGGTTTTCTGt        |
| CYP76AA24          | rev                | CTAATACATGTTATGTAGCAGGCGTGGTGTGGGA      |
| CYP76AA25          | fwd                | ATGGAGACTCCACCGCTTTCTTGGTAC             |
| CYP76AA25          | rev                | CTAGTATAGATGATGCGGTAGACGTGGCATC         |
| CYP76AA26          | fwd                | ATGCAGATTTGATTCAGCAACATTTAGAGCAG        |
| CYP76AA26          | rev                | CTAAACATTCAAACGCACCATGCTTGTGAA          |
| CYP76Z2            | fwd                | GTCATGGATTCAATCAATTTTGCTTCATC           |
| CYP76Z2            | rev                | CTAAAACCTTGATGACATTCCTTGTTAGG           |
| CYP750B1           | fwd                | TCGTTTGCATAGAAATGGATCTCAATATGAGC        |
| CYP750B1           | rev                | CTAAATTTAAGGTTAAAAGGTTTCAATCCCTCTAACCTC |

**qRT-PCR**

| <b>Target Gene</b>   | <b>Orientation</b> | <b>Sequence in 5'-3' direction</b> |
|----------------------|--------------------|------------------------------------|
| CYP76AA25            | fwd                | CGAAGACTTCACTGTCGTTGA              |
| CYP76AA25            | rev                | TCGTTTCGGTACCTGCAATA               |
| CYP750B1             | fwd                | GCGTTCCTGCAATAGGACTC               |
| CYP750B1             | rev                | GAAGAGCTCCCAACTGATGC               |
| (+)-Sabinen Synthase | fwd                | AAATGAAATTGCCCAAGCAC               |
| (+)-Sabinen Synthase | rev                | TCTGTTCAAGCGAAGGATTC               |
| Ef_alpha             | fwd                | GCAGCTTCCTTCTCAAACG                |
| Ef_alpha             | rev                | CATTGGCCATGTTGACTCTG               |
| Actin                | fwd                | GGAGGAACTGGTCTTGCTTG               |
| Actin                | rev                | CCACTACTGCTGAGCGTGAA               |
| GADPH                | fwd                | ATTGGAGACAGCCGATCAAG               |
| GADPH                | rev                | AGCCCCATTCGTTGTCATAC               |
| RNAPol-III           | fwd                | GTGGTTCCTTTGGAAGACCA               |
| RNAPol-III           | rev                | CCACTCCCCTAAAGCTTCT                |

### pESC Leu-2d modification for user cloning

| Target                       | Orientation | Sequence in 5'-3' direction                    |
|------------------------------|-------------|------------------------------------------------|
| MCSI-ΔPacI <sup>a</sup>      | fwd         | CAATAGATTTAGAGCTTGACGGGGAAAG                   |
| MCSI-ΔPacI <sup>a</sup>      | rev         | CTGAGCTCTTAGATAACAATTCTTCGCCAG                 |
| MCSII_USER-site <sup>b</sup> | fwd         | GATCCGCTGAGGATTAATTAAGCGGCCGCTTAATTAACCCTCAGCC |
| MCSII_USER-site <sup>b</sup> | rev         | TCGAGGCTGAGGGTTAATTAAGCGGCCGCTTAATTAATCCTCAGCG |

<sup>a</sup> cloning was achieved using NgoMVI and MCSI SacI site

<sup>b</sup> oligos contained 5' phosphorylation and were cloned after annealing into BamHI and HindIII site of MCSII

### P450 User cloning

| Target         | Orientation | Sequence in 5'-3' direction      |
|----------------|-------------|----------------------------------|
| CYP76AA20_User | fwd         | GGATTAUAATGGAAAGCCATCTGTTCTAC    |
| CYP76AA20_User | rev         | GGGTAAUCTAATATATGTGATGTTGTAGGCGT |
| CYP76AA21_User | fwd         | GGATTAUAATGGAAAGCTATTATGCCCATC   |
| CYP76AA21_User | rev         | GGGTAAUCTAATATATGTTATGTGGCAGGC   |
| CYP76AA22_User | fwd         | GGATTAUAATGGAAATTCCACAACCTTTCTTG |
| CYP76AA22_User | rev         | GGGTAAUCTAGTATAGATGATGCGGCAG     |
| CYP76AA23_User | fwd         | GGATTAUAATGGATTTTCAGAATCTTTCTTG  |
| CYP76AA23_User | rev         | GGGTAAUTTAGTACAAGTTATGTGGGAG     |
| CYP76AA24_User | fwd         | GGATTAUAATGGATAAGCAACCGGTGTTT    |
| CYP76AA24_User | rev         | GGGTAAUCTAATACATGTTATGTAGCAGGCGT |
| CYP76AA25_User | fwd         | GGATTAUAATGGAGACTCCACCGCTTTC     |
| CYP76AA25_User | rev         | GGGTAAUCTAGTATAGATGATGCGGTAGAC   |
| CYP76AA26_User | fwd         | GGATTAUAATGATCTTTGTATGGAACCTGTG  |
| CYP76AA26_User | rev         | GGGTAAUGTGGGTACCCCTAGTATATATG    |
| CYP76Z2_User   | fwd         | GGATTAUAATGGATTCAATCAATTTTGCTTC  |
| CYP76Z2_User   | rev         | GGGTAAUCTAAAACCTTGATGACATTCCTT   |
| CYP750B1_User  | fwd         | GGATTAUAATGGATCTCAATATGAGCGT     |
| CYP750B1_User  | rev         | GGGTAAUCTAAATTTTAAGGTTAAAAGGTTT  |
