# Supplementary material
Source: PubMed Central journal article supplement (PMC4424034)
Supplement: supp_pp.15.00315_00315R1_Supplemental_Table_S2.pdf [file supp_pp.15.00315_00315R1_Supplemental_Table_S2.pdf]

**Supplemental Table S2: P450 sequences, with accession numbers and P450 family and clan associations, used as search baits against the WRC transcriptome**

| Accession number | CYP450 family | CYP450 clan |
|------------------|---------------|-------------|
| Q9SAA9           | 51            | 51          |
| Q9XHE7           | 71            | 71          |
| P92994           | 73            | 71          |
| P37120           | 75            | 71          |
| O23976           | 76            | 71          |
| Q9LZ31           | 77            | 71          |
| Q949U1           | 79            | 71          |
| P47195           | 80            | 71          |
| Q9LSF8           | 82            | 71          |
| P48421           | 83            | 71          |
| NP_196053        | 84            | 71          |
| NP_200940        | 89            | 71          |
| ABC69383         | 92            | 71          |
| Q9XHC6           | 93            | 71          |
| O48957           | 99            | 71          |
| Q93ZB2           | 701           | 71          |
| NP_193268        | 705           | 71          |
| AEE83115         | 706           | 71          |
| Q948Y1           | 719           | 71          |
| Q50EK6           | 720           | 71          |
| AAL62063         | 726           | 71          |
| ADE76383         | 734           | 71          |
| ACM89789         | 736           | 71          |
| Q9SHG5           | 72            | 72          |
| Q93Z79           | 714           | 72          |
| NP_198460        | 716           | 72          |
| CAB86384         | 74            | 74          |
| ABD62342         | 85            | 85          |
| Q43246           | 88            | 85          |
| Q42569           | 90            | 85          |
| NP_974574        | 707           | 85          |
| NP_175990        | 708           | 85          |
| Q9AXM6           | 750           | 85          |
| Q6F4F5           | 724           | 86          |
| Q93VK5           | 97            | 97          |
| O64697           | 710           | 710         |
| B9DFU2           | 711           | 711         |
| NP_001153093     | 727           | 727         |
| XP_001774589     | 746           | 746         |
